# Supplementary material
Source: HighWire-hosted journal article supplement (http://erj.ersjournals.com/highwire/filestream/113178/field_highwire_adjunct_files/0/ERS_CHIDIAC_LEGIONELLA_Additional_Table_28_04_2011.pdf)
Supplement: ERS_CHIDIAC_LEGIONELLA_Additional_Table_28_04_2011.pdf [file ERS_CHIDIAC_LEGIONELLA_Additional_Table_28_04_2011.pdf]

**Additional table.** At-admission clinical, biological and radiographic characteristics of survivor and in-hospital non-survivor patients hospitalized in France with LD due to *Lp1* serogroup

| <b>Feature</b>              | <b>Survivors<br/>(n = 496)</b> | <b>Non-survivors<br/>(n = 44)</b> | <b><i>P</i><br/>value</b> | <b>All cases<br/>(n = 540)</b> |
|-----------------------------|--------------------------------|-----------------------------------|---------------------------|--------------------------------|
| <b>General</b>              |                                |                                   |                           |                                |
| Temperature >38.5°C         | 435 (87.7)                     | 30 (68.2)                         | .001                      | 465 (86.1)                     |
| Chills                      | 335 (67.5)                     | 20 (45.5)                         | .004                      | 355 (65.7)                     |
| Anorexia                    | 153 (30.8)                     | 13 (29.5)                         | 1                         | 166 (30.7)                     |
| Myalgia                     | 159 (32.1)                     | 9 (20.5)                          | .13                       | 168 (31.1)                     |
| <b>Respiratory</b>          |                                |                                   |                           |                                |
| Dyspnea                     | 343 (69.2)                     | 40 (90.9)                         | .002                      | 383 (70.9)                     |
| Cough                       | 343 (69.2)                     | 26 (59.1)                         | .18                       | 369 (68.3)                     |
| Expectoration               | 148 (29.8)                     | 11 (25.0)                         | .61                       | 159 (29.4)                     |
| Haemoptysis                 | 33 (6.7)                       | 1 (2.3)                           | .35                       | 34 (6.3)                       |
| Thoracic pain               | 100 (20.2)                     | 8 (18.2)                          | .85                       | 108 (20.0)                     |
| Pleural pain                | 28 (5.6)                       | 2 (4.5)                           | 1                         | 30 (5.6)                       |
| <b>Gastrointestinal</b>     |                                |                                   |                           |                                |
| Nausea                      | 112 (22.6)                     | 4 (9.1)                           | .04                       | 116 (21.5)                     |
| Diarrhea                    | 105 (21.2)                     | 7 (15.9)                          | .56                       | 112 (20.7)                     |
| Abdominal pain              | 80 (16.1)                      | 4 (9.1)                           | .28                       | 84 (15.6)                      |
| <b>Neurological</b>         |                                |                                   |                           |                                |
| Confusion                   | 146 (29.4)                     | 21 (47.7)                         | .02                       | 167 (30.9)                     |
| Headache                    | 136 (27.4)                     | 2 (4.5)                           | <.001                     | 138 (25.6)                     |
| <b>Physical examination</b> |                                |                                   |                           |                                |
| Respiratory rate/min        | 25 [10-84]                     | 28 [14-60]                        | .03                       | 26 [10-84]                     |

|                                           |                    |                    |       |                    |
|-------------------------------------------|--------------------|--------------------|-------|--------------------|
| Heart rate/min                            | 100 [38-183]       | 110 [50-180]       | .02   | 100 [38-183]       |
| Systolic blood pressure, mmHg             | 130 [70-220]       | 120 [60-170]       | <.001 | 128 [60-220]       |
| Diastolic blood pressure, mmHg            | 70 [30-123]        | 64 [30-120]        | .01   | 70 [30-123]        |
| <b>Biological variables</b>               |                    |                    |       |                    |
| Serum sodium <130 mmol/L                  | 134 (27.0)         | 13 (29.5)          | .73   | 147 (27.2)         |
| Serum creatinine >160 µmol/L <sup>a</sup> | 59 (11.9)          | 17 (38.6)          | <.001 | 76 (14.1)          |
| CPK >250 U/L <sup>*</sup>                 | 117 (23.6)         | 16 (36.4)          | .72   | 133 (24.6)         |
| CRP >500 mg/L                             | 38 (7.7)           | 10 (22.7)          | .003  | 48 (8.9)           |
| AST >180 U/L <sup>†</sup>                 | 59 (11.9)          | 8 (18.2)           | .24   | 67 (12.4)          |
| ALT >180 U/L <sup>†</sup>                 | 27 (5.4)           | 5 (11.4)           | .17   | 32 (5.9)           |
| PaO <sub>2</sub> <60 mmHg                 | 174 (35.1)         | 18 (40.9)          | .73   | 192 (35.6)         |
| Lymphocytes g/L                           | 0.81 [0.02-88.80]  | 0.57 [0.16-2.21]   | .001  | 0.80 [0.02-88.80]  |
| Neutrophils g/L                           | 9.62 [1.22-36.00]  | 11.70 [3.14-31.20] | .009  | 9.81 [1.22-36.00]  |
| Polymorphonuclears<br>leucocytesg/L       | 10.70 [1.64-39.00] | 12.40 [0.10-33.20] | .04   | 10.70 [0.10-39.00] |
| <b>Radiographic finding</b>               |                    |                    |       |                    |
| Alveolar infiltrate                       | 246 (49.6)         | 21 (47.7)          | .88   | 267 (49.4)         |
| Interstitial infiltrate                   | 58 (11.7)          | 7 (15.9)           | .47   | 65 (12.0)          |
| Alveolo-interstitial infiltrate           | 193 (38.9)         | 16 (36.4)          | .87   | 209 (38.7)         |
| Pleural effusion                          | 41 (8.3)           | 3 (6.8)            | 1     | 44 (8.1)           |
| Unilobar infiltrate                       | 254 (51.2)         | 11 (25.0)          | .001  | 265 (49.1)         |
| Multilobar or bilateral infiltrate        | 191 (38.5)         | 29 (65.9)          | .001  | 220 (40.7)         |

---

Data are reported as median [minimum-maximum] or as number (%).

**Abbreviations:** AST, aspartate aminotransferase; ALT, alanine aminotransferase; CPK, creatine phosphokinase; CRP, C-reactive protein.

**SI conversion factors:** To convert AST, ALT and CPK to microkatal per liter, multiply by 0.0167; CRP to nmol/L, multiply by 9.524; PaO<sub>2</sub> to kilopascals, multiply by 0.133.

\* Two times the normal value.

† Four times the normal value.
